# Supplementary material
Source: Springer Nature journal article supplement (https://www.springermedizin.de/resource/supplementary/12933_2013_806_MOESM5_ESM.pdf/9539276)

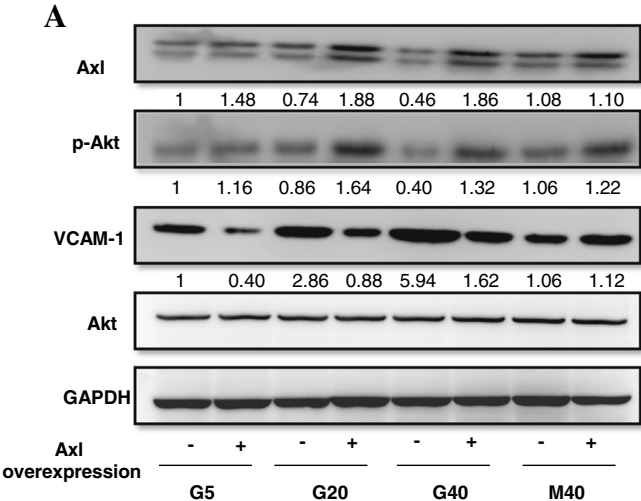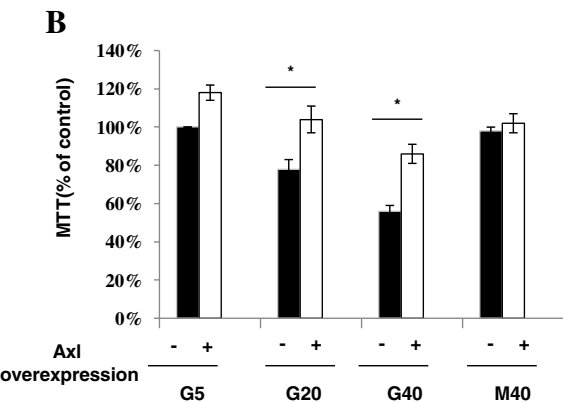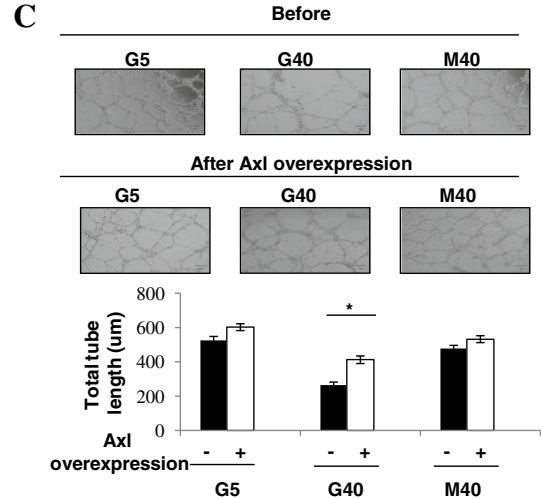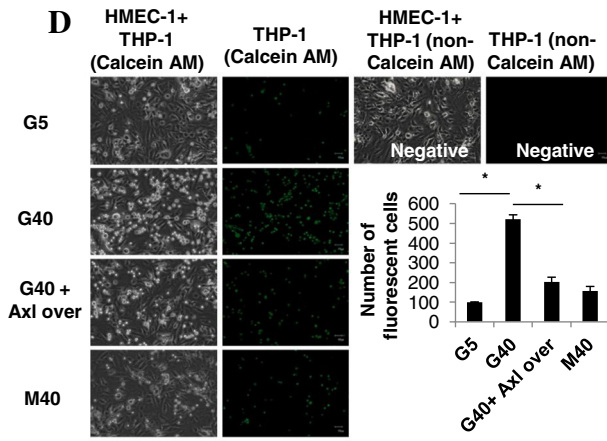

Supplement: MOESM5 [file 9539276]
